# Supplementary material for: Sub-second photo-annealing of solution-processed metal oxide thin-film transistors via irradiation of intensely pulsed white light
Source: Royal Society of Chemistry journal article supplement (doi:10.1039/c4ra01371a), 2014-01-01
Supplement: c4ra01371a1.pdf [file c4ra01371a1.pdf]

## Supporting information

### Sub-second photo-annealing of solution-processed metal oxide thin-film transistors via irradiation of intensely pulsed white light

Tae-Hee Yoo<sup>1</sup>, Seong-Ji Kwon<sup>1</sup>, Hak-Sung Kim<sup>2</sup>, Jae-Min Hong<sup>1</sup>, Jung Ah Lim<sup>1,\*</sup> and Yong-Won Song<sup>1,\*</sup>

\* Authors to whom correspondence should be addressed; electronic mails: [jalim@kist.re.kr](mailto:jalim@kist.re.kr), [ysong@kist.re.kr](mailto:ysong@kist.re.kr) TEL: +82 29585378; Fax: +82 29585307

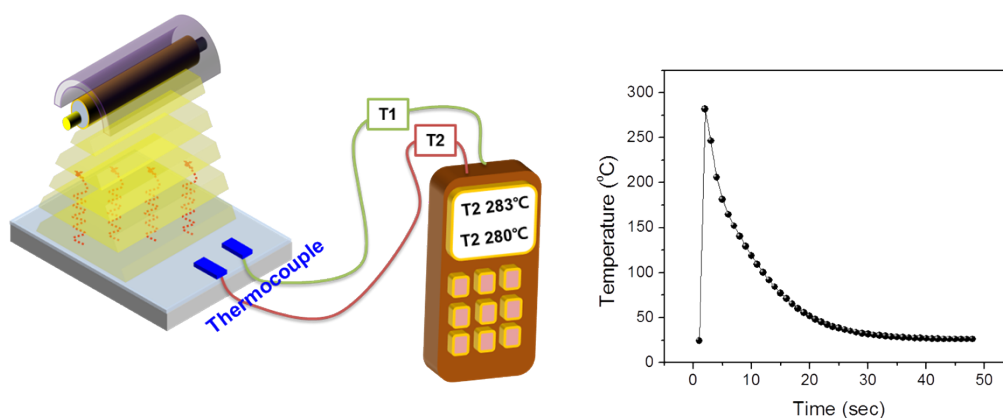

Figure S1. Measurement of the surface temperature during/after IPWL annealing process using thermocouple.

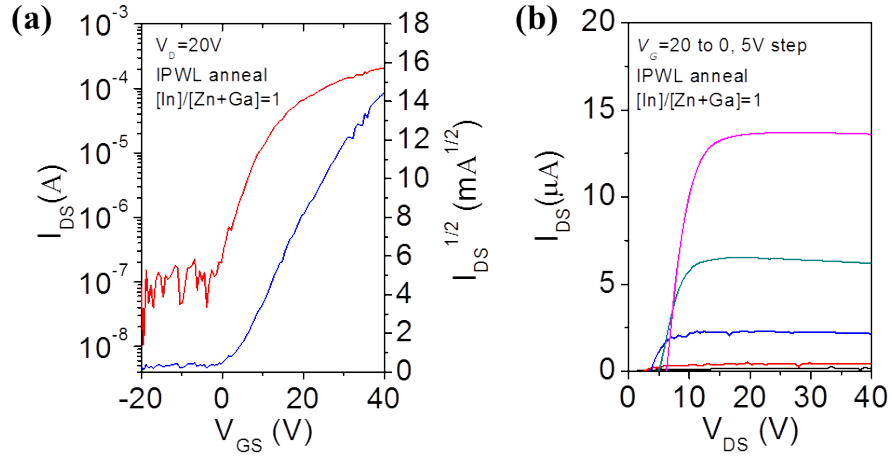

| $\mu_{\text{sat}}$ (cm <sup>2</sup> /V·s) | $I_{\text{on}}/I_{\text{off}}$ | $V_{\text{th}}$ (V) | S.S (V/decade) |
|-------------------------------------------|--------------------------------|---------------------|----------------|
| 0.86                                      | $1.74 \times 10^3$             | 0.27                | 5.4            |

Figure S2. (a)  $I_{DS}$ - $V_{GS}$  and (b)  $I_{DS}$ - $V_{DS}$  characteristics of by IPWL-annealed IGZO TFT with different pulse condition. (pulse duration time: 1ms, free temporal period: 30 ms, number of pulses: 70, applied voltage: 330 V)
